# Supplementary material for: The reduction behavior of sulfurized polyacrylonitrile (SPAN) in lithium–sulfur batteries using a carbonate electrolyte: a computational study
Source: Royal Society of Chemistry journal article supplement (doi:10.1039/d3cp06248a), 2024-01-01
Supplement: d3cp06248a2.pdf [file d3cp06248a2.pdf]

## Supporting Information

# Elucidating the reduction behavior of sulfurized poly(acrylonitrile) (SPAN) in lithium-sulfur-batteries using a carbonate electrolyte: A computational study

S. V. Klostermann, J. Kappler, A. Waigum, M. R. Buchmeiser,  
A. Köhn, and J. Kästner

### Contents

|          |                                                                    |          |
|----------|--------------------------------------------------------------------|----------|
| <b>1</b> | <b>Population Analysis</b>                                         | <b>2</b> |
| <b>2</b> | <b>Sulfur Chain Splitting and Lithiation Investigations</b>        | <b>4</b> |
| 2.1      | Initial split Investigations . . . . .                             | 4        |
| 2.2      | Lithiation Investigations and Li <sup>+</sup> Placements . . . . . | 4        |
| 2.3      | Minimum Energy Structures . . . . .                                | 8        |
| <b>3</b> | <b>Redox Potential Calculations</b>                                | <b>9</b> |
| <b>4</b> | <b>Cartesian Coordinates of all Structures</b>                     | <b>9</b> |

# 1 Population Analysis

Figure S1 shows a graphical representation of the naming of the areas studied for population analysis. The detailed individual charges of the neutral and the charged model are shown in the Tables S1–S2 for each investigated functional and for MP2.

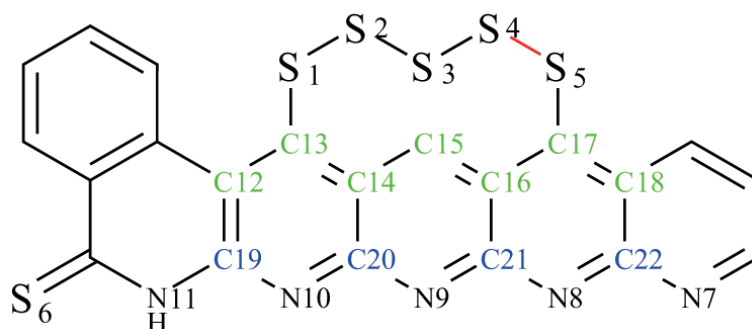

Figure S1: Indices for calculated population analyses. Green carbons: Carbons C, blue carbons: Carbons N, red line: investigated S-S bond.

Table S1: Differences in NBO charges for structures **0** to **2a** or **2b** for MP2, BP86-D3(BJ), and TPSSh-D3(BJ).

| Atom Number | MP2      |           |                  | BP86-D3(BJ) |           |                  | TPSSh-D3(BJ) |           |                  |
|-------------|----------|-----------|------------------|-------------|-----------|------------------|--------------|-----------|------------------|
|             | charges  |           | $\Delta$ charges | charges     |           | $\Delta$ charges | charges      |           | $\Delta$ charges |
|             | <b>0</b> | <b>2a</b> |                  | <b>0</b>    | <b>2b</b> |                  | <b>0</b>     | <b>2b</b> |                  |
| S 5         | 0.150    | 0.120     | -0.030           | 0.129       | -0.074    | -0.203           | 0.131        | -0.286    | -0.416           |
| S 4         | 0.011    | -0.079    | -0.090           | -0.001      | -0.211    | -0.210           | 0.001        | -0.570    | -0.571           |
| S 3         | 0.026    | 0.002     | -0.024           | 0.021       | 0.167     | 0.147            | 0.017        | 0.061     | 0.044            |
| S 2         | -0.002   | -0.066    | -0.064           | -0.014      | -0.448    | -0.434           | -0.007       | -0.154    | -0.147           |
| S 1         | 0.163    | 0.130     | -0.033           | 0.143       | -0.191    | -0.334           | 0.142        | -0.024    | -0.166           |
| S 6         | -0.257   | -0.458    | -0.202           | -0.110      | -0.286    | -0.175           | -0.188       | -0.275    | -0.087           |
| N 7         | -0.620   | -0.629    | -0.009           | -0.471      | -0.504    | -0.034           | -0.519       | -0.552    | -0.033           |
| N 8         | -0.616   | -0.718    | -0.102           | -0.453      | -0.529    | -0.076           | -0.503       | -0.609    | -0.106           |
| N 9         | -0.649   | -0.774    | -0.125           | -0.476      | -0.527    | -0.051           | -0.528       | -0.574    | -0.046           |
| N 10        | -0.653   | -0.717    | -0.064           | -0.501      | -0.575    | -0.074           | -0.535       | -0.572    | -0.037           |
| N 11        | -0.661   | -0.624    | 0.037            | -0.538      | -0.538    | 0.000            | -0.548       | -0.550    | -0.002           |
| C 12        | -0.129   | -0.179    | -0.050           | -0.084      | -0.156    | -0.072           | -0.080       | -0.129    | -0.050           |
| C 13        | -0.063   | -0.293    | -0.230           | -0.105      | -0.133    | -0.029           | -0.095       | -0.093    | 0.003            |
| C 14        | -0.202   | -0.060    | 0.142            | -0.112      | -0.133    | -0.021           | -0.117       | -0.148    | -0.031           |
| C 15        | -0.031   | -0.431    | -0.400           | -0.162      | -0.148    | 0.014            | -0.130       | -0.104    | 0.026            |
| C 16        | -0.193   | -0.040    | 0.153            | -0.109      | -0.131    | -0.022           | -0.114       | -0.155    | -0.040           |
| C 17        | -0.035   | -0.339    | -0.303           | -0.095      | -0.118    | -0.022           | -0.083       | -0.107    | -0.025           |
| C 18        | -0.184   | -0.140    | 0.044            | -0.123      | -0.148    | -0.026           | -0.124       | -0.172    | -0.048           |
| C 19        | 0.640    | 0.527     | -0.114           | 0.475       | 0.448     | -0.027           | 0.504        | 0.480     | -0.024           |
| C 20        | 0.589    | 0.588     | -0.002           | 0.446       | 0.437     | -0.009           | 0.468        | 0.456     | -0.012           |
| C 21        | 0.564    | 0.582     | 0.019            | 0.438       | 0.432     | -0.006           | 0.457        | 0.452     | -0.005           |
| C 22        | 0.554    | 0.485     | -0.069           | 0.434       | 0.416     | -0.018           | 0.453        | 0.436     | -0.017           |

Table S2: Differences in NBO charges for structures **0** to **2a** or **2b** for B3LYP-D3(BJ), M06, and cam-B3LYP.

| Atom Number | B3LYP-D3(BJ) |           |                  | M06      |           |                  | cam-B3LYP |           |                  |
|-------------|--------------|-----------|------------------|----------|-----------|------------------|-----------|-----------|------------------|
|             | charges      |           | $\Delta$ charges | charges  |           | $\Delta$ charges | charges   |           | $\Delta$ charges |
|             | <b>0</b>     | <b>2b</b> |                  | <b>0</b> | <b>2a</b> |                  | <b>0</b>  | <b>2a</b> |                  |
| S 5         | 0.134        | -0.262    | -0.396           | 0.135    | 0.081     | -0.054           | 0.128     | 0.088     | -0.040           |
| S 4         | -0.003       | -0.589    | -0.586           | 0.003    | -0.113    | -0.117           | 0.005     | -0.110    | -0.115           |
| S 3         | 0.025        | 0.045     | 0.020            | 0.024    | -0.035    | -0.059           | 0.018     | -0.030    | -0.048           |
| S 2         | -0.003       | -0.148    | -0.145           | 0.002    | -0.080    | -0.082           | -0.001    | -0.069    | -0.067           |
| S 1         | 0.140        | -0.019    | -0.160           | 0.141    | 0.102     | -0.038           | 0.137     | 0.104     | -0.033           |
| S 6         | -0.176       | -0.265    | -0.089           | -0.165   | -0.358    | -0.193           | -0.190    | -0.378    | -0.188           |
| N 7         | -0.521       | -0.554    | -0.033           | -0.546   | -0.582    | -0.037           | -0.528    | -0.563    | -0.036           |
| N 8         | -0.510       | -0.619    | -0.110           | -0.536   | -0.644    | -0.108           | -0.513    | -0.639    | -0.127           |
| N 9         | -0.534       | -0.581    | -0.047           | -0.563   | -0.667    | -0.104           | -0.540    | -0.667    | -0.127           |
| N 10        | -0.542       | -0.575    | -0.033           | -0.568   | -0.635    | -0.067           | -0.550    | -0.624    | -0.074           |
| N 11        | -0.558       | -0.558    | 0.000            | -0.594   | -0.583    | 0.011            | -0.577    | -0.557    | 0.019            |
| C 12        | -0.080       | -0.132    | -0.051           | -0.085   | -0.143    | -0.058           | -0.084    | -0.150    | -0.066           |
| C 13        | -0.091       | -0.083    | 0.008            | -0.088   | -0.227    | -0.138           | -0.080    | -0.225    | -0.145           |
| C 14        | -0.119       | -0.152    | -0.033           | -0.128   | -0.093    | 0.035            | -0.133    | -0.084    | 0.048            |
| C 15        | -0.127       | -0.101    | 0.025            | -0.118   | -0.314    | -0.196           | -0.115    | -0.349    | -0.234           |
| C 16        | -0.118       | -0.156    | -0.038           | -0.126   | -0.078    | 0.048            | -0.128    | -0.072    | 0.056            |
| C 17        | -0.073       | -0.100    | -0.027           | -0.067   | -0.295    | -0.228           | -0.067    | -0.308    | -0.241           |
| C 18        | -0.124       | -0.174    | -0.049           | -0.132   | -0.126    | 0.006            | -0.130    | -0.126    | 0.004            |
| C 19        | 0.511        | 0.486     | -0.025           | 0.537    | 0.465     | -0.073           | 0.526     | 0.450     | -0.076           |
| C 20        | 0.472        | 0.460     | -0.012           | 0.496    | 0.492     | -0.005           | 0.481     | 0.482     | 0.000            |
| C 21        | 0.461        | 0.458     | -0.003           | 0.483    | 0.490     | 0.007            | 0.466     | 0.483     | 0.018            |
| C 22        | 0.457        | 0.441     | -0.016           | 0.478    | 0.433     | -0.045           | 0.463     | 0.417     | -0.046           |

Table S3: Differences in NBO charges for structures **0** to **2a** or **2b** for PBE0-D3(BJ) and PBEh-3c.

| Atom Number | PBE0-D3(BJ) |           |                  | PBEh-3c  |           |                  |
|-------------|-------------|-----------|------------------|----------|-----------|------------------|
|             | charges     |           | $\Delta$ charges | charges  |           | $\Delta$ charges |
|             | <b>0</b>    | <b>2a</b> |                  | <b>0</b> | <b>2b</b> |                  |
| S 5         | 0.137       | 0.093     | -0.044           | 0.145    | 0.105     | -0.040           |
| S 4         | 0.003       | -0.099    | -0.103           | 0.006    | -0.093    | -0.098           |
| S 3         | 0.021       | -0.034    | -0.056           | 0.020    | -0.027    | -0.047           |
| S 2         | -0.002      | -0.075    | -0.073           | -0.001   | -0.074    | -0.073           |
| S 1         | 0.145       | 0.109     | -0.035           | 0.152    | 0.120     | -0.032           |
| S 6         | -0.178      | -0.387    | -0.209           | -0.184   | -0.394    | -0.211           |
| N 7         | -0.523      | -0.564    | -0.042           | -0.549   | -0.584    | -0.035           |
| N 8         | -0.508      | -0.619    | -0.111           | -0.536   | -0.649    | -0.114           |
| N 9         | -0.534      | -0.643    | -0.109           | -0.563   | -0.684    | -0.120           |
| N 10        | -0.542      | -0.617    | -0.076           | -0.570   | -0.646    | -0.076           |
| N 11        | -0.563      | -0.553    | 0.010            | -0.608   | -0.588    | 0.021            |
| C 12        | -0.085      | -0.139    | -0.055           | -0.093   | -0.151    | -0.058           |
| C 13        | -0.096      | -0.240    | -0.145           | -0.100   | -0.261    | -0.161           |
| C 14        | -0.125      | -0.097    | 0.028            | -0.140   | -0.091    | 0.049            |
| C 15        | -0.137      | -0.325    | -0.188           | -0.117   | -0.346    | -0.228           |
| C 16        | -0.122      | -0.087    | 0.034            | -0.136   | -0.076    | 0.060            |
| C 17        | -0.081      | -0.286    | -0.205           | -0.084   | -0.319    | -0.235           |
| C 18        | -0.130      | -0.132    | -0.002           | -0.140   | -0.134    | 0.006            |
| C 19        | 0.514       | 0.445     | -0.069           | 0.547    | 0.466     | -0.081           |
| C 20        | 0.474       | 0.470     | -0.003           | 0.503    | 0.506     | 0.002            |
| C 21        | 0.462       | 0.467     | 0.006            | 0.488    | 0.502     | 0.014            |
| C 22        | 0.458       | 0.416     | -0.042           | 0.484    | 0.437     | -0.047           |

Table S4: Single point energies for structures **0**, **2a**, **2b**, and **2c** in Hartree for different levels of theory.

| Structure | Single point energies /Hartree |            |            |             |            |
|-----------|--------------------------------|------------|------------|-------------|------------|
|           | LCC                            | M06        | cam-B3LYP  | PBE0-D3(BJ) | PBEh-3c    |
| <b>0</b>  | -3464.5828                     | -3468.2408 | -3468.5937 | -3467.1320  | -3464.8579 |
| <b>2a</b> | -3464.8595                     | -3468.5193 | -3468.8711 | -3467.4135  | -3465.1463 |
| <b>2b</b> | -3464.8957                     | -3468.5477 | -3468.9075 | -3467.4341  | -3465.1734 |
| <b>2c</b> | -3464.8802                     | -3468.5316 | -3468.8956 | -3467.4201  | -3465.1608 |

## 2 Sulfur Chain Splitting and Lithiation Investigations

### 2.1 Initial split Investigations

For the energetically most favorable splitting of the sulfur chain, energies of different splitting patterns were calculated. Structure **0** belongs to the neutral, uncharged SPAN model with non-split chain, **2b** has a 4-1 split chain with  $S_1$  and  $S_4$  sulfur chain residues and **2c** a 3-2 split sulfur chain with  $S_3$  and  $S_2$  sulfur chain residues.

Table S5: Investigated sulfur chain splitting patterns with their relative energies. Geometry optimizations at PBEh-3c/def2-mSVP level of theory. Single-point energies at cam-B3LYP/def2-TZVPD level of theory.

| Structure | ZPE /a.u. | $E_{elec}$ /a.u. | $\Delta E$ /eV | $\Delta E_{relative}$ /eV |
|-----------|-----------|------------------|----------------|---------------------------|
| <b>0</b>  | 0.2741    | -3468.5937       | 0.000          |                           |
| <b>2a</b> | 0.2711    | -3468.8711       | -7.547         | 0.000                     |
| <b>2b</b> | 0.2717    | -3468.9075       | -8.536         | -0.989                    |
| <b>2c</b> | 0.2713    | -3468.8956       | -8.213         | -0.666                    |

### 2.2 Lithiation Investigations and $Li^+$ Placements

The energy of electron and lithium cation addition was determined by calculating the individual steps and the concerted addition and comparing their energies relative to each other. The energies for the first and second lithiation are shown exemplarily in Table S6.

Table S6: Gibbs free energies of the respective systems with different order of steps with respect to the separated compounds **0** and  $Li^+$ .

| System       | $E_{elec}$ /Hartree | G(T) /Hartree | $G_{total}$ /eV | $\Delta G_{rel.}$ /eV | Charge | Step   |
|--------------|---------------------|---------------|-----------------|-----------------------|--------|--------|
| $Li^+$       | -7.4024             | -             | -201.346        | -                     | 1      | -      |
| <b>0</b>     | -3468.5937          | 0.2226        | -94340.317      | 0.000                 | 0      | -      |
| <b>1_Li0</b> | -3468.7433          | 0.2199        | -94344.460      | -4.143                | -1     | e-     |
| <b>0_Li1</b> | -3476.0151          | 0.2224        | -94542.186      | -0.523                | 1      | Li+    |
| <b>1_Li1</b> | -3476.1838          | 0.2216        | -94546.798      | -5.135                | 0      | Li+/e- |
| <b>2_Li1</b> | -3476.3744          | 0.2214        | -94552.010      | -10.346               | -1     | e-     |
| <b>1_Li2</b> | -3483.5882          | 0.2203        | -94748.234      | -5.224                | 1      | Li+    |
| <b>2_Li2</b> | -3483.8176          | 0.2214        | -94754.443      | -11.434               | 0      | Li+/e- |
| <b>2_Li0</b> | -3468.9075          | 0.2204        | -94348.912      | -8.595                | -2     | 2e-    |

Based on the position of the spin density, the four positions for lithium cation placement can be identified in the following lithiations. The spin density is preferably localized at the ends of the free sulfur chains. Figure S2 shows the spin density distribution of structure **1\_Li1**.

For each electron step, different  $Li^+$  placements were investigated. Their relative energies to each other were examined. Four possible placement positions were distinguished:

- The 'between' position between the sulfur chain residues at the SPAN backbone. Marked as **\_b** attached at the structure name.
- The 'middle' position in the middle of the longer sulfur chain residue. Marked as **\_m** attached at the structure name.

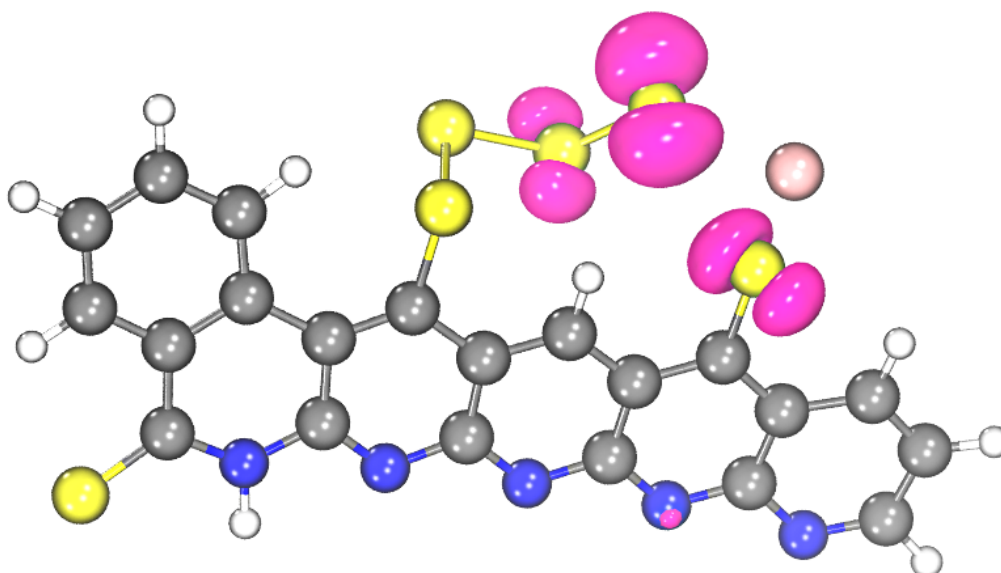

Figure S2: Calculated spin density (color: magenta) of structure **1\_Li1** on the orbitals of the optimized geometry.

- The 'other' position on the other side of the backbone near the shorter sulfur chain residue. Marked as **\_o** attached at the structure name.
- The 'end' position at the free end of the longer sulfur chain residue at the SPAN backbone. Marked as **\_e** attached at the structure name.

The energetically favored placement, which was the between position for  $n = 1$ , was taken as the starting point for the next reduction step. Based on the optimized **1Li\_b** structure, the four placement options were examined again for  $n = 2$ . The energetically best one was selected, see Table S7.

Table S7: Gibbs free energies of the four different possible  $\text{Li}^+$  placements relative to each other in the respective electron step  $n$ .

| System         | $E_{\text{elec}}$ /Hartree | $G(T)$ /Hartree | $G_{\text{total}}$ /Hartree | $\Delta G_{\text{rel.}}$ /eV |
|----------------|----------------------------|-----------------|-----------------------------|------------------------------|
| Step $n = 1$   |                            |                 |                             |                              |
| <b>1_Li1_b</b> | -3476.1838                 | 0.2216          | -3475.9622                  | 0.000                        |
| <b>1_Li1_m</b> | -3476.1756                 | 0.2202          | -3475.9554                  | 0.187                        |
| <b>1_Li1_o</b> |                            | moves to b      |                             |                              |
| <b>1_Li1_e</b> |                            | moves to m      |                             |                              |
| Step $n = 2$   |                            |                 |                             |                              |
| <b>2_Li2_b</b> | -3483.8071                 | 0.2207          | -3483.5864                  | 0.000                        |
| <b>2_Li2_m</b> | -3483.8143                 | 0.2208          | -3483.5935                  | -0.193                       |
| <b>2_Li2_o</b> | -3483.8140                 | 0.2208          | -3483.5932                  | -0.186                       |
| <b>2_Li2_e</b> | -3483.8176                 | 0.2214          | -3483.5962                  | -0.267                       |

Figures S3–S8 show the structures of the steps  $n = 1$  and  $n = 2$  with different placements of  $\text{Li}^+$ . All distances are given in Ångstrom. Color coding: grey= carbon, blue= nitrogen, yellow=sulfur, pink=lithium, white= hydrogen.

Nudged elastic band (NEB) path of the lithiation process from **2\_Li2** to **3\_Li3**. In the process, the lithium cation from the environment approaches and binds to the sulfur chain. The electron is delocalized on the SPAN backbone. A low barrier is visible.

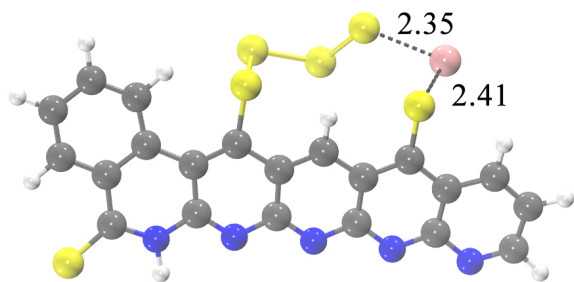

Figure S3: Structure **1\_Li1\_b** with one attached  $\text{Li}^+$  at the 'between' position between the sulfur chain residues at the SPAN backbone.

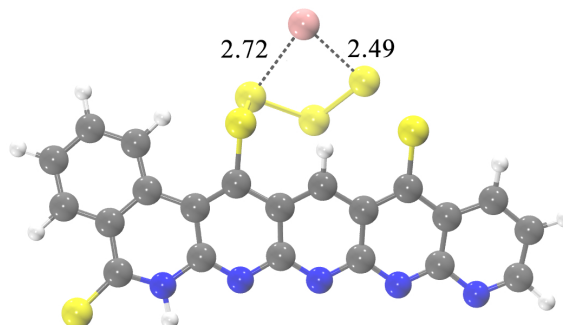

Figure S4: Structure **1\_Li1\_m** with the attached  $\text{Li}^+$  at the 'middle' position in the middle of the longer sulfur chain residue at the SPAN backbone.

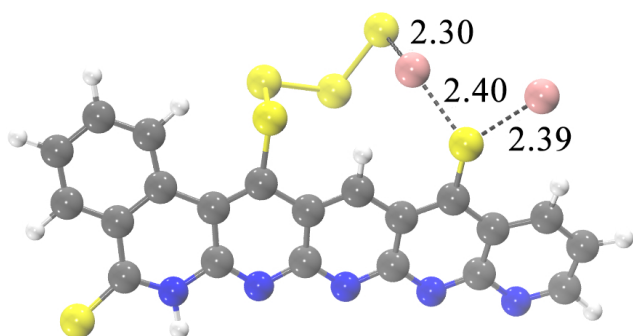

Figure S5: Structure **2\_Li2\_b** with the new attached  $\text{Li}^+$  at the 'between' position between the sulfur chain residues at the SPAN backbone.

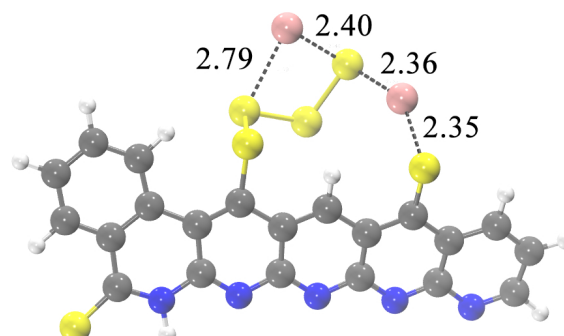

Figure S6: Structure **2\_Li2\_m** with the new attached  $\text{Li}^+$  at the 'middle' position in the middle of the longer sulfur chain residue at the SPAN backbone.

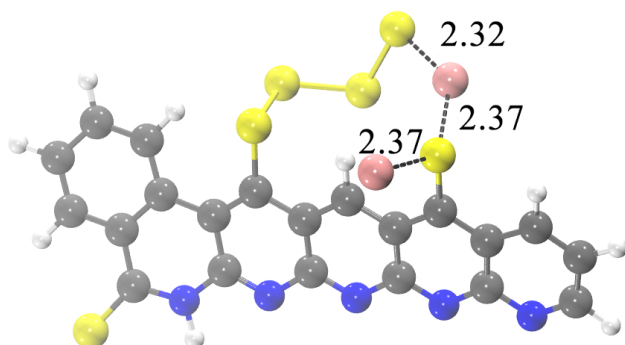

Figure S7: Structure **2\_Li2\_o** with the new attached  $\text{Li}^+$  at the 'other' position on the other side of the backbone near the shorter sulfur chain residue at the SPAN backbone.

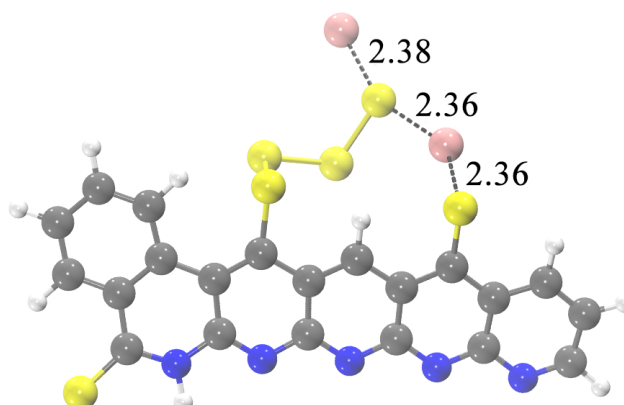

Figure S8: Structure **2\_Li2\_e** with the new attached  $\text{Li}^+$  at the 'end' position at the free end of the longer sulfur chain residue at the SPAN backbone.

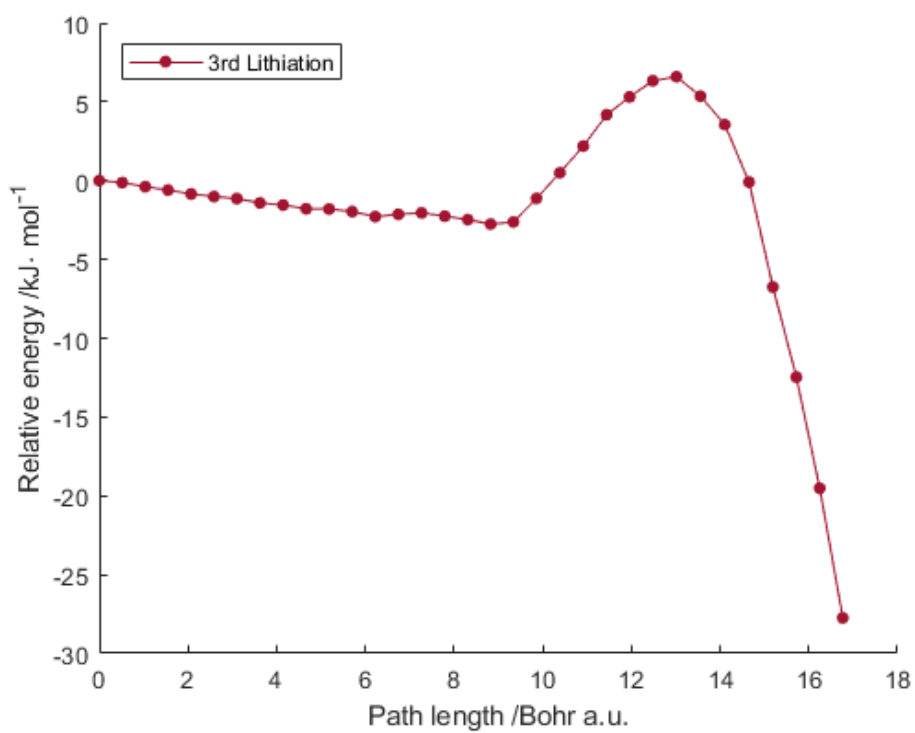

Figure S9: Calculated relative energy along the NEB path for the 3<sup>rd</sup> lithiation of SPAN. A path length of 0 corresponds to Li<sup>+</sup> at a distance of 10.35 Å from **3\_Li2**, while the path length at 16.8 Bohr corresponds to **3\_Li3**.

## 2.3 Minimum Energy Structures

To discover the minimum energy structure at each electron step, we explore various potential pathways. Consequently, we assess the options of introducing a pair of a lithium cation and an electron, removing a  $\text{Li}_2\text{S}$  molecule, or performing both actions in a concerted manner.

Table S8: Relative Gibbs free energies for different possible reaction steps starting from  $n = 2$  (2\_Li2).

| System        | $E_{\text{elec}}/\text{Hartree}$ | $G(\text{T})/\text{Hartree}$ | $G_{\text{total}}/\text{eV}$ | $G_{\text{rel.}}/\text{eV}$ | Step                                  |
|---------------|----------------------------------|------------------------------|------------------------------|-----------------------------|---------------------------------------|
| 2_Li2         | -3483.8176                       | 0.2214                       | -94754.443                   | 0.000                       |                                       |
| 2_Li0 + Li2S  | -3483.6582                       | 0.1972                       | -94750.765                   | 3.678                       | Detachment                            |
| 3_Li1 + Li2S  | -3491.3429                       | 0.1977                       | -94959.778                   | -3.989                      | Detachment + $\text{Li}^+/\text{e}^-$ |
| 3_Li3         | -3491.3971                       | 0.2195                       | -94960.659                   | -4.870                      | Li+/e-                                |
| 3_Li3         |                                  |                              | -94960.659                   | 0.000                       |                                       |
| 3_Li1 + Li2S  | -3491.3425                       | 0.1979                       | -94959.769                   | 0.891                       | Detachment                            |
| 4_Li2 + Li2S  | -3498.9753                       | 0.1983                       | -95167.364                   | -5.359                      | Detachment + $\text{Li}^+/\text{e}^-$ |
| 4_Li4         | -3498.9539                       | 0.2159                       | -95166.301                   | -4.296                      | Li+/e-                                |
| 4_Li2 + Li2S  | -3498.9753                       | 0.1983                       | -95167.364                   | 0.000                       |                                       |
| 4_Li0 + 2Li2S | -3498.8241                       | 0.1729                       | -95163.943                   | 3.421                       | Detachment                            |
| 5_Li1 + 2Li2S | -3506.5054                       | 0.1748                       | -95372.823                   | -4.113                      | Detachment + $\text{Li}^+/\text{e}^-$ |
| 5_Li3 Li2S    | -3506.5565                       | 0.1946                       | -95373.673                   | -4.963                      | Li+/e-                                |

Table S9: Gibbs free energies of the respective minimum energy systems with different order of steps with respect to the separated compounds **1** and  $\text{Li}^+/\text{Li}_2\text{S}$ .

| System                | $E_{\text{elec}}/\text{Hartree}$ | $G(\text{T})/\text{Hartree}$ | $G_{\text{total}}/\text{Hartree}$ | $G_{\text{total}}/\text{eV}$ | $G_{\text{rel.}}/\text{eV}$ |
|-----------------------|----------------------------------|------------------------------|-----------------------------------|------------------------------|-----------------------------|
| $\text{Li}^+$         | -7.4024                          |                              | -7.4024                           | -201.346                     |                             |
| $\text{Li}_2\text{S}$ | -413.3824                        | -0.0232                      | -413.4056                         | -11244.708                   |                             |
| <b>0</b>              | -3468.5937                       | 0.2226                       | -3468.3711                        | -94340.317                   | 0.000                       |
| <b>1_Li1</b>          | -3476.1838                       | 0.2208                       | -3475.9630                        | -94546.821                   | -5.135                      |
| <b>2_Li2</b>          | -3483.8176                       | 0.2214                       | -3483.5962                        | -94754.443                   | -11.434                     |
| <b>3_Li3</b>          | -3491.3971                       | 0.2187                       | -3491.1785                        | -94960.683                   | -16.304                     |
| <b>4_Li2</b>          | -3085.5928                       | 0.2730                       | -3085.3198                        | -83921.255                   | -21.663                     |
| <b>5_Li3</b>          | -3093.1740                       | 0.2212                       | -3092.9528                        | -84128.873                   | -26.626                     |
| <b>6_Li2</b>          | -2687.3632                       | 0.2207                       | -2687.1425                        | -73090.760                   | -31.784                     |
| <b>7_Li3</b>          | -2694.9450                       | 0.2176                       | -2694.7275                        | -73297.073                   | -36.720                     |
| <b>8_Li2</b>          | -2289.1487                       | 0.2186                       | -2288.9301                        | -62259.311                   | -42.326                     |
| <b>9_Li3</b>          | -2296.7247                       | 0.2166                       | -2296.5081                        | -62465.433                   | -47.111                     |
| <b>10_Li2</b>         | -1890.8653                       | 0.2169                       | -1890.6484                        | -51425.977                   | -51.029                     |
| <b>11_Li3</b>         | -1898.4277                       | 0.2145                       | -1898.2132                        | -51631.741                   | -55.447                     |
| <b>12_Li2</b>         | -1492.5929                       | 0.2169                       | -1492.3759                        | -40592.894                   | -59.962                     |



### 3 Redox Potential Calculations

Fe(+II)/Fe(+III) and Cu(+II)/Cu(+III) references for redox potential calculations are shown in table S10.

Table S10: Calculated Gibbs free energies and absolute potentials of the redox systems Fe(+II)/Fe(+III) and Cu(+II)/Cu(+III).

| System                      | Multiplicity | G(T) /Hartree | E <sub>elec</sub> /Hartree | E <sub>total</sub> /eV | E <sub>absolute</sub> /V |
|-----------------------------|--------------|---------------|----------------------------|------------------------|--------------------------|
| Fe(+II)*18H <sub>2</sub> O  | 5, high spin | 0.3939        | -2639.8473                 | -71793.607             | 0.000                    |
| Fe(+III)*18H <sub>2</sub> O | 6, high spin | 0.3941        | -2639.6387                 | -71787.927             | 5.681                    |
| Cu(+II)*18H <sub>2</sub> O  | 2            | 0.3943        | -3016.6034                 | -82041.431             | 0.000                    |
| Cu(+III)*18H <sub>2</sub> O | 3            | 0.3994        | -3016.3269                 | -82033.770             | 7.660                    |

Table S11: Redox potentials vs. Li/Li<sup>+</sup> for the dominating species during the discharge mechanism.

| Structure     | E° (V vs. Li/Li <sup>+</sup> ) |                             |
|---------------|--------------------------------|-----------------------------|
|               | Soluble Li <sub>2</sub> S      | Nucleated Li <sub>2</sub> S |
| <b>0</b>      | > 3.672                        | > 3.672                     |
| <b>2_Li2</b>  | 3.672                          | 3.672                       |
| <b>6_Li2</b>  | -                              | 3.250                       |
| <b>7_Li3</b>  | -                              | 3.038                       |
| <b>8_Li2</b>  | 3.104                          | -                           |
| <b>9_Li3</b>  | 2.741                          | 2.748                       |
| <b>12_Li2</b> | 2.238                          | 2.633                       |

### 4 Cartesian Coordinates of all Structures

All optimized structures are provided in the file a11.xyz. Structure names with index **\_a** indicate a structure with attached Li<sub>2</sub>S molecule(s).
